# Supplementary material for: Thermodynamic, kinetic and solid-state study of divalent metal complexes of 1,4,8,11-tetraazacyclotetradecane (cyclam) bearing two trans (1,8-)methylphosphonic acid pendant arms
Source: Royal Society of Chemistry journal article supplement (doi:10.1039/b603251f), 2006-01-01
Supplement: b603251f.pdf [file b603251f.pdf]

Electronic Supplementary Information (ESI) for Dalton Transaction

**Thermodynamic, kinetic and solid-state study of divalent metal complexes of  
1,4,8,11-tetraazacyclotetradecane (cyclam) bearing two *trans* (1,8-)  
methylphosphonic acid pendant arms**

**Ivona Svobodová,<sup>a</sup> Přemysl Lubal,<sup>\*a</sup> Jan Plutnar,<sup>b</sup> Jana Havlíčková,<sup>b</sup> Jan Kotek,<sup>b</sup> Petr  
Hermann,<sup>\*b</sup> and Ivan Lukeš<sup>b</sup>**

<sup>a</sup> Department of Analytical Chemistry, Masarykova univerzita (Masaryk University), Kotlářská 2, Brno, 602 00, Czech Republic. Tel: +420-54949-5637, Fax: +420-54949-2494, E-mail: [lubal@chemi.muni.cz](mailto:lubal@chemi.muni.cz)

<sup>b</sup> Department of Inorganic Chemistry, Universita Karlova (Charles University), Hlavova 2030, Prague 2, 128 40, Czech Republic. Tel: +420-22195-1263, Fax: +420-22195-1253, E-mail: [petrh@natur.cuni.cz](mailto:petrh@natur.cuni.cz)

**Figure S1** Ligand and selected metal-ligand (M:L=1:1) titration curves.

**Figure S2** Distribution diagrams of  $M^{2+}$ -1,8-H<sub>4</sub>te2p systems ( $c_M = c_L = 0.004 \text{ mol dm}^{-3}$ ); M = Mg, Ca and Mn.

**Figure S3** Crystal packing in the structure of *trans*-O,O-[Zn(H<sub>2</sub>L)] complex.

**Figure S4** The crystal packing in the structure of  $[\{(H_2O)_5Mn\}_2(\mu-H_2L)](H_2L) \cdot 21H_2O$ .

**Figure S5** Disorder of the H<sub>2</sub>L<sup>2-</sup> anion found in the structure of  $[\{(H_2O)_5Mn\}_2(\mu-H_2L)](H_2L) \cdot 21H_2O$ .

**Figure S6** Speciation diagram of 1,8-H<sub>4</sub>te2p.

**Figure S7** Examples of dependence of experimental  $^f k_{obs}$  constant on  $[Zn^{2+}]$ .

**Figure S8** Examples of logarithmic analysis of kinetic experimental data for complexation of Zn<sup>2+</sup> by 1,8-H<sub>4</sub>te2p.

**Figure S9** Examples of dependence of experimental  $^f k_{obs}$  constant on  $[Cd^{2+}]$ .

**Figure S10** Examples of logarithmic analysis of kinetic experimental data for complexation of Cd<sup>2+</sup> by 1,8-H<sub>4</sub>te2p.

**Figure S11** Partial speciation in Cu<sup>2+</sup>-OH<sup>-</sup>, Zn<sup>2+</sup>-OH<sup>-</sup> and Cd<sup>2+</sup>-OH<sup>-</sup> systems ( $c_M = 0.002 \text{ mol dm}^{-3}$ ,  $I = 0.1 \text{ M}$ ).

**Figure S12** Molecular structure of 1,8-H<sub>4</sub>te2p in the solid state.

**Table S1** Example of evaluation of the formation kinetics data for the Zn<sup>2+</sup>-1,8-H<sub>4</sub>te2p system by logarithmic analysis

**Table S2** Example of evaluation of the formation kinetics data for the Cd<sup>2+</sup>-1,8-H<sub>4</sub>te2p system by logarithmic analysis

**Table S3** Summary of the second-order rate constants ( $k_2$ ) for complexation in the Zn<sup>2+</sup>-1,8-H<sub>4</sub>te2p and Cd<sup>2+</sup>-1,8-H<sub>4</sub>te2p systems.

**Table S4** Example of experimental kinetic data for dissociation of the  $[Zn(L)]^{2-}$  complex with Cu<sup>2+</sup> ion as a ligand scavenger.

**Table S5** Summary of the pseudo-first-order rate constants ( $^d k_{obs}$ ) for the dissociation of the  $[Zn(L)]^{2-}$  and  $[Cd(L)]^{2-}$  complexes.

## Thermodynamic stability of metal complexes

**Figure S1** Ligand and selected metal-ligand (M:L=1:1) titration curves.

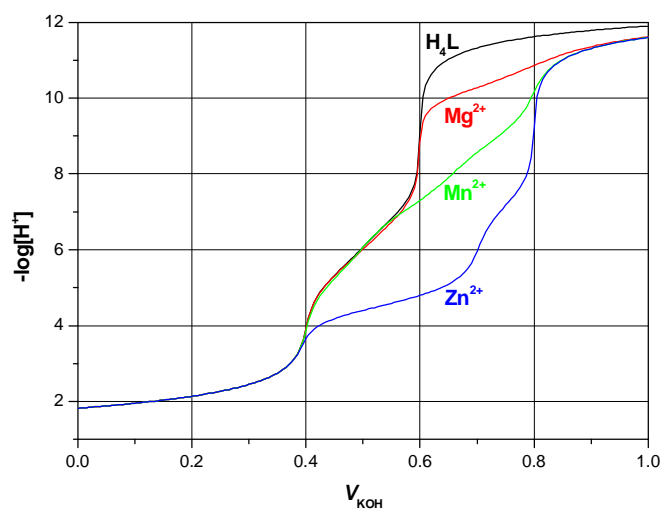

**Figure S2** Distribution diagrams of  $M^{2+}$ -1,8-H<sub>4</sub>te2p systems ( $c_M = c_L = 0.004 \text{ mol dm}^{-3}$ ); M = Mg (A), Ca (B) and Mn (C).

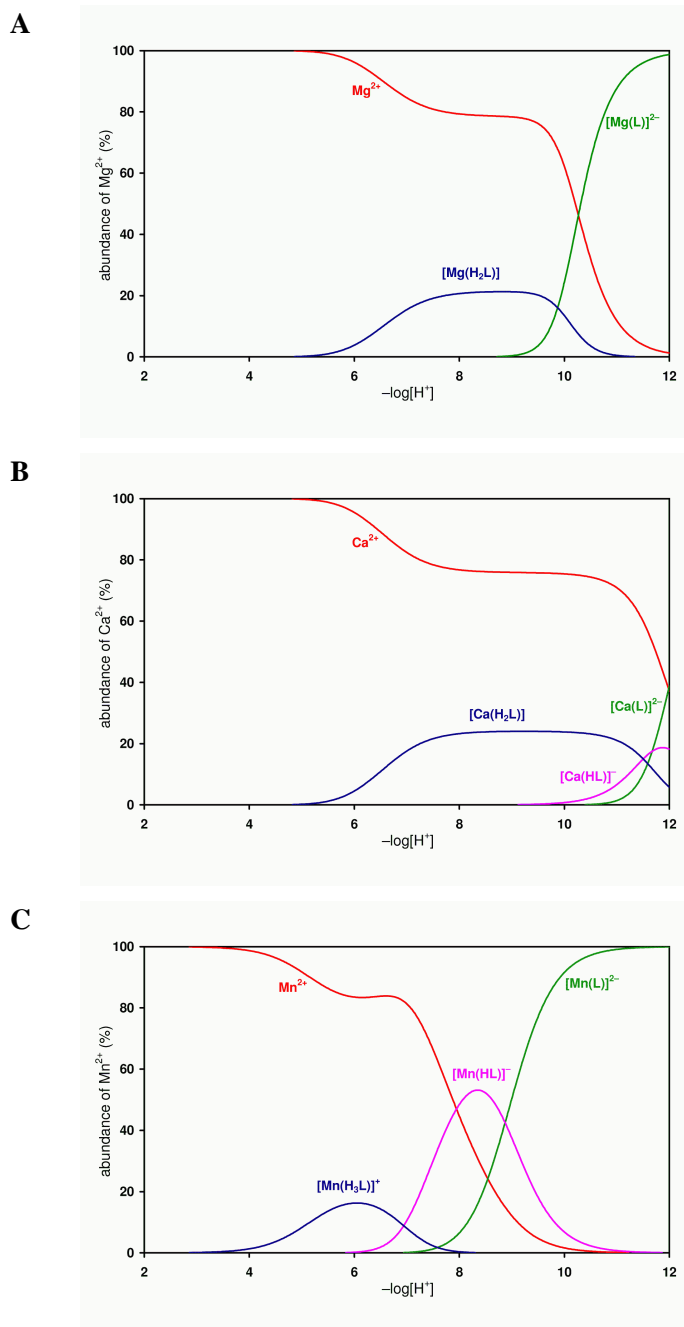

### X-ray crystal structures

**Figure S3** Crystal packing in the structure of *trans*-O,O-[Zn(H<sub>2</sub>L)] complex. The view down to *x* axis. Hydrogen atoms attached to carbon atoms are omitted for clarity. Hydrogen bonds are dashed. C, N, O, P and Zn

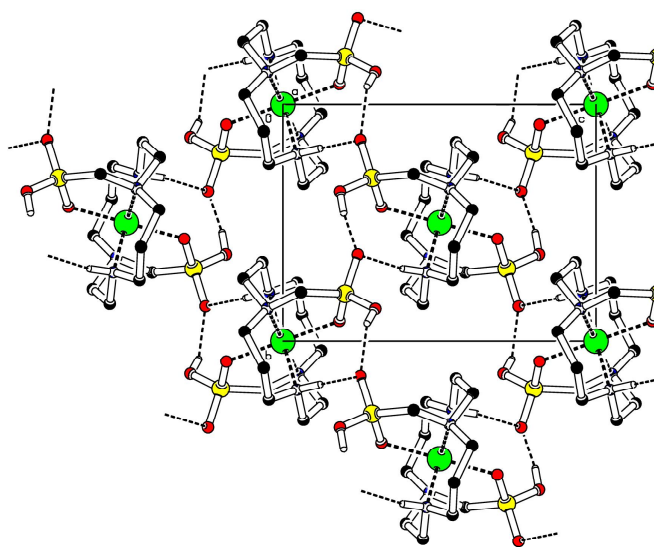

**Figure S4** The crystal packing in the structure of [ $\{(H_2O)_5Mn\}_2(\mu-H_2L)(H_2L)\cdot 2H_2O$ ]. The view down to *x*-axis. Uncoordinated water molecules and hydrogen atoms attached to carbon atoms are omitted for clarity. C, N, O, P and Mn

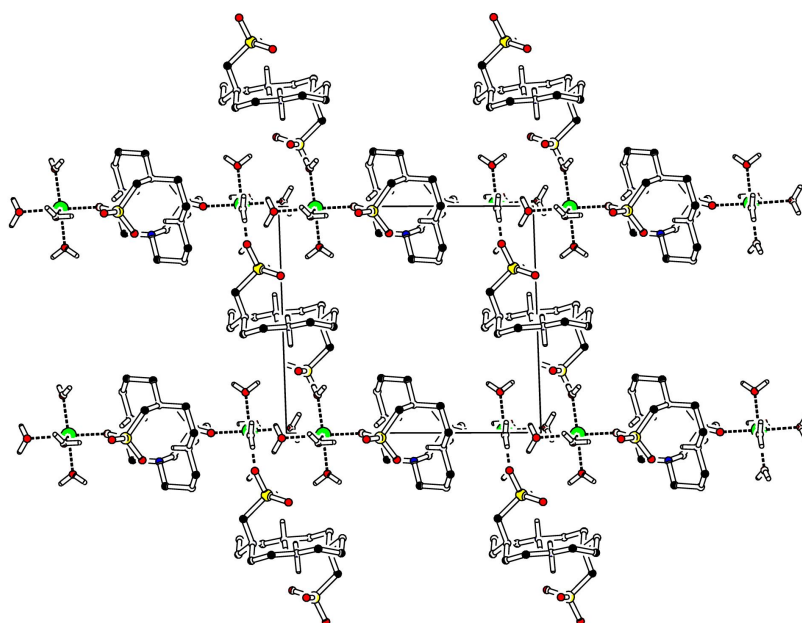

**Figure S5** Disorder of the  $\text{H}_2\text{L}^{2-}$  anion found in the structure of  $[\{(\text{H}_2\text{O})_5\text{Mn}\}_2(\mu\text{-H}_2\text{L})](\text{H}_2\text{L})\cdot 21\text{H}_2\text{O}$ . (A) The most abundant arrangement; (B) The less abundant arrangement. H, C, N, O, P

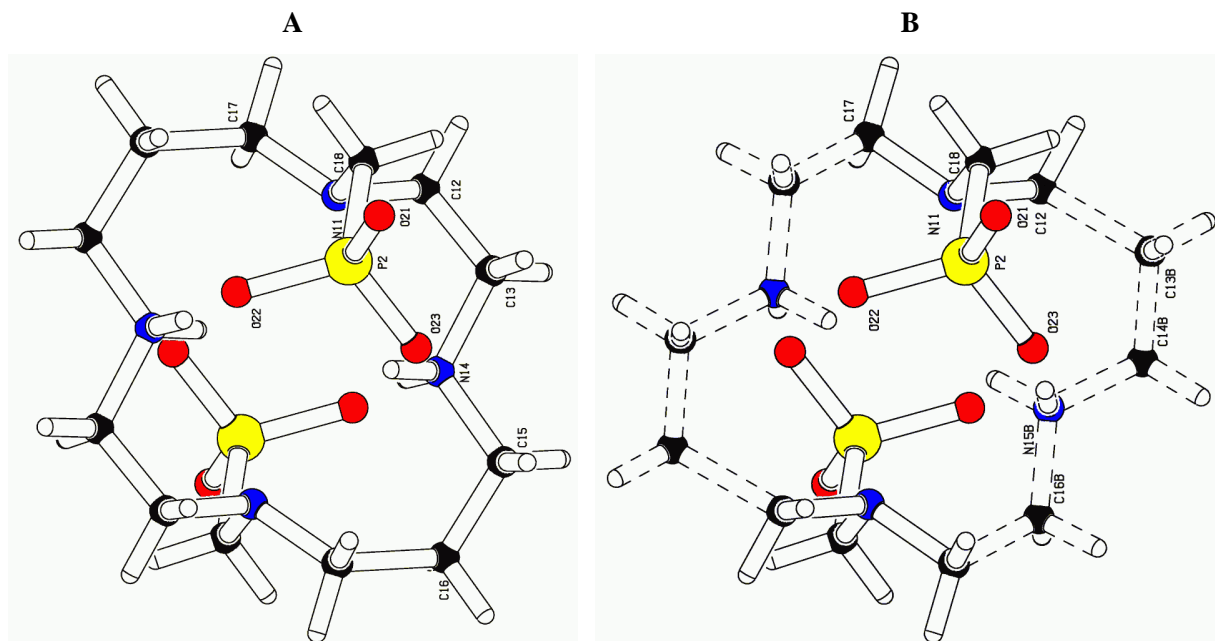

## Formation kinetics

**Figure S6** Speciation diagram of 1,8-H<sub>4</sub>te2p (reproduced from ref.<sup>1</sup>)

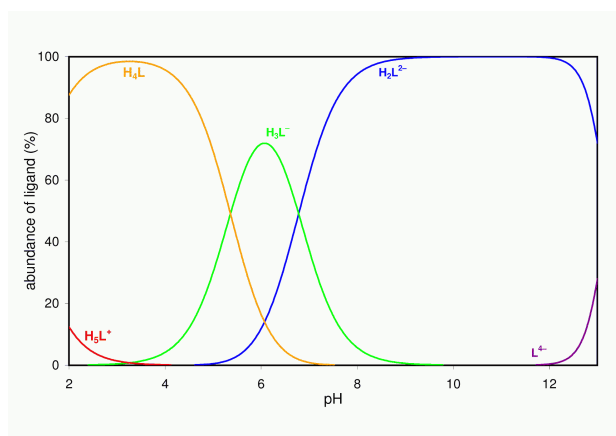

**Figure S7** Example of dependence of experimental  $k_{\text{obs}}$  constant on  $[\text{Zn}^{2+}]$ . Other experimental conditions are given in the text

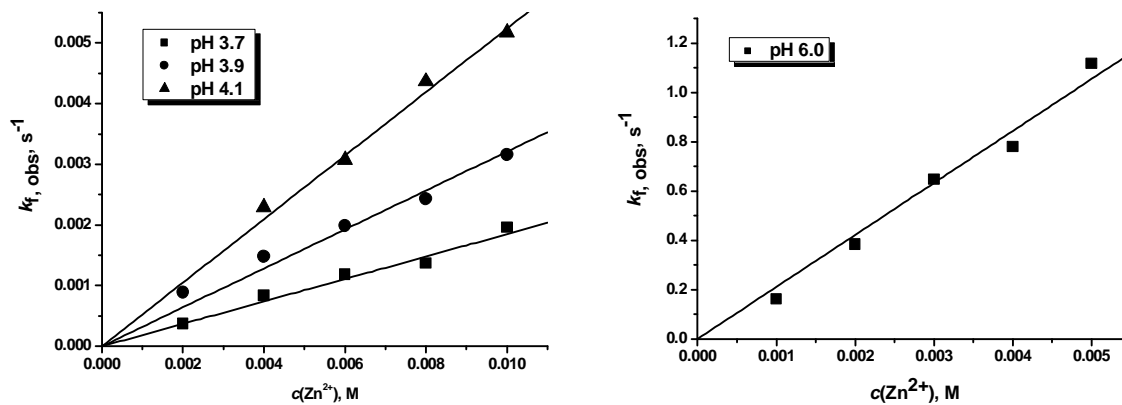

**Figure S8** Examples of logarithmic analysis of kinetic experimental data for complexation of  $\text{Zn}^{2+}$  by 1,8- $\text{H}_4\text{te2p}$ .

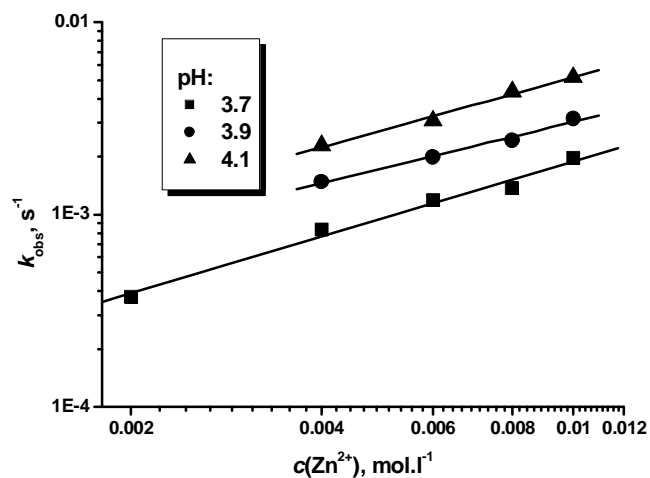

**Table S1** Example of evaluation of the formation kinetics data for the  $\text{Zn}^{2+}$ -1,8- $\text{H}_4\text{te2p}$  system by logarithmic analysis.

| pH  | Logarithmic analysis |
|-----|----------------------|
|     | $n$                  |
| 3.7 | $0.98 \pm 0.06$      |
| 3.9 | $0.80 \pm 0.06$      |
| 4.1 | $0.91 \pm 0.07$      |
| 6.0 | $1.18 \pm 0.06$      |



**Figure S9** Examples of dependence of experimental  $k_{\text{obs}}$  constant on  $[\text{Cd}^{2+}]$ .

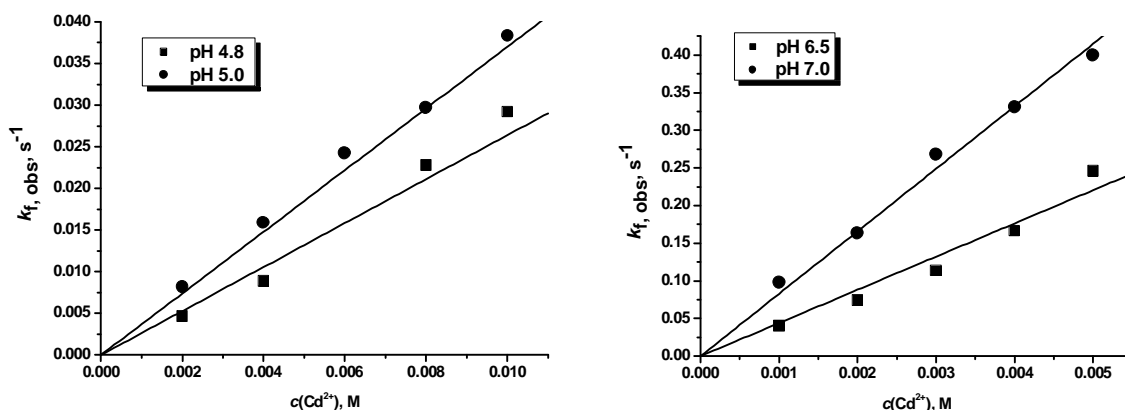

**Figure S10** Examples of logarithmic analysis of kinetic experimental data for complexation of  $\text{Cd}^{2+}$  by 1,8- $\text{H}_4\text{te}2\text{p}$ .

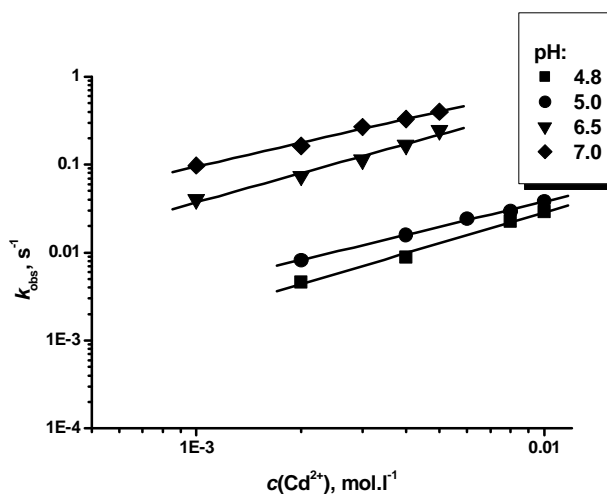

**Table S2** Example of evaluation of the formation kinetics data for the  $\text{Cd}^{2+}$ -1,8- $\text{H}_4\text{te}2\text{p}$  system by logarithmic analysis

| pH  | Logarithmic analysis |
|-----|----------------------|
|     | $n$                  |
| 4.8 | $1.17 \pm 0.07$      |
| 5.0 | $0.94 \pm 0.05$      |
| 6.5 | $1.10 \pm 0.08$      |
| 7.0 | $0.90 \pm 0.04$      |

**Table S3** Summary of the second-order rate constants ( $^f k_2$ ) for complexation in the  $\text{Zn}^{2+}$ -1,8- $\text{H}_4\text{te}2\text{p}$  and  $\text{Cd}^{2+}$ -1,8- $\text{H}_4\text{te}2\text{p}$  systems. The standard deviation of the rate constants corresponds with the last digit.

| $\text{Zn}^{2+}$ |                                       | $\text{Cd}^{2+}$ |                                       |
|------------------|---------------------------------------|------------------|---------------------------------------|
| pH               | $^f k_2, \text{M}^{-1} \text{s}^{-1}$ | pH               | $^f k_2, \text{M}^{-1} \text{s}^{-1}$ |
| 3.7              | 0.185(6)                              | 4.6              | 1.5 <sub>6</sub> (2 <sub>7</sub> )    |
| 3.9              | 0.32 <sub>1</sub> (1 <sub>2</sub> )   | 4.8              | 2.64(2 <sub>2</sub> )                 |
| 4.1              | 0.52 <sub>4</sub> (1 <sub>9</sub> )   | 5.0              | 3.7 <sub>0</sub> (1 <sub>3</sub> )    |
| 4.5              | 0.88 <sub>3</sub> (8 <sub>0</sub> )   | 5.2              | 4.1 <sub>0</sub> (1 <sub>0</sub> )    |
| 4.7              | 1.42 <sub>3</sub> (7 <sub>9</sub> )   | 5.4              | 7.9(9)                                |
| 5.2              | 5.8(9)                                | 5.6              | 13.2(5)                               |
| 6.0              | 211(7)                                | 5.9              | 14.5(2)                               |
| 6.3              | 1851(119)                             | 6.1              | 25(1)                                 |
| 6.5              | 1650(97)                              | 6.3              | 41(1)                                 |
| 6.7              | 3487(170)                             | 6.5              | 44(2)                                 |
| 6.8              | 3165(167)                             | 6.8              | 112(6)                                |
| ---              | ---                                   | 7.0              | 83(2)                                 |

**Figure S11** Partial speciation in  $\text{Cu}^{2+}\text{-OH}^-$ ,  $\text{Zn}^{2+}\text{-OH}^-$  and  $\text{Cd}^{2+}\text{-OH}^-$  systems ( $c_M = 0.002 \text{ mol dm}^{-3}$ ,  $I = 0.1 \text{ M}$ ; constructed with data from refs.<sup>2,3</sup>). The metal hydroxides are given as not precipitating species.

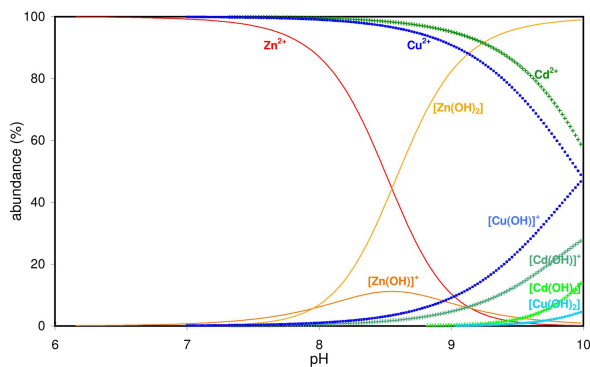

**Figure S12** Molecular structure of 1,8- $\text{H}_4\text{te2p}$  in the solid state.<sup>1</sup>

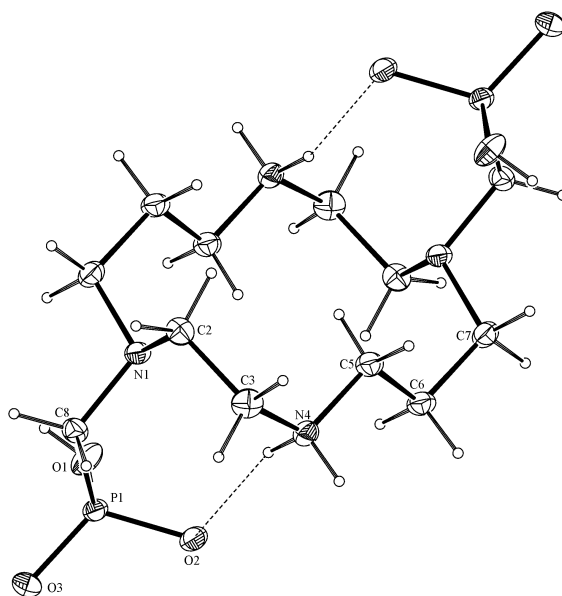

### Dissociation kinetics

**Table S4** Example of experimental kinetic data for dissociation of the  $[\text{Zn}(\text{L})]^{2-}$  complex with  $\text{Cu}^{2+}$  ion as a ligand scavenger. The standard deviation of the rate constants corresponds with the last digit.

| pH   | ${}^d k_{\text{obs}} \times 10^3, \text{s}^{-1}$ |         |         | average value ${}^d k_{\text{obs}} \times 10^3, \text{s}^{-1}$ |
|------|--------------------------------------------------|---------|---------|----------------------------------------------------------------|
|      | $c(\text{Cu}^{2+}), \text{mol dm}^{-3}$          |         |         |                                                                |
|      | 0.001                                            | 0.002   | 0.003   |                                                                |
| 3.71 | 5.0(5)                                           | 5.1(5)  | 4.9(5)  | 5.0(1)                                                         |
| 4.50 | 1.56(7)                                          | 1.46(6) | 1.59(6) | 1.54(7)                                                        |
| 4.71 | 1.11(5)                                          | 1.14(4) | 1.13(4) | 1.13(1)                                                        |

**Table S5** Summary of the pseudofirst-order rate constants ( ${}^d k_{\text{obs}}$ ) for the dissociation of the  $[\text{Zn}(\text{L})]^{2-}$  and  $[\text{Cd}(\text{L})]^{2-}$  complexes. The standard deviation of the rate constants corresponds with the last digit.

| pH   | $\text{Zn}^{2+}$                                 |         | $\text{Cd}^{2+}$ |                                                  |
|------|--------------------------------------------------|---------|------------------|--------------------------------------------------|
|      | ${}^d k_{\text{obs}} \times 10^3, \text{s}^{-1}$ |         | pH               | ${}^d k_{\text{obs}} \times 10^3, \text{s}^{-1}$ |
|      | $\text{Cu}^{2+}$                                 | PAR     |                  |                                                  |
| 3.71 | 5.0(1)                                           | 5.5(5)  | 4.50             | 177(3)                                           |
| 3.91 | 4.3(5)                                           | 4.9(5)  | 4.73             | 41(3)                                            |
| 4.12 | 3.1(4)                                           | 4.3(2)  | 5.15             | 10.8(1)                                          |
| 4.32 | 2.1(2)                                           | 3.0(2)  | 5.50             | 2.49(3)                                          |
| 4.50 | 1.54(7)                                          | 2.2(1)  | 5.83             | 1.273(8)                                         |
| 4.71 | 1.13(1)                                          | 1.72(7) | 6.11             | 0.664(9)                                         |
| 4.80 | 0.86(3)                                          | ---     | ---              | ---                                              |

## References:

---

<sup>1</sup> J. Kotek, P. Vojtíšek, I. Císařová, P. Hermann, P. Jurečka, J. Rohovec and I. Lukeš, *Collect. Czech. Chem. Commun.*, 2000, **65**, 1289.

<sup>2</sup> (a) A. E. Martell and R. M. Smith, *Critical Stability Constants*. Plenum Press, New York, 1974–1989, Vols. 1-6; (b) *NIST Standard Reference Database 46 (Critically Selected Stability Constants of Metal Complexes)*, Version 7.0, 2003.

<sup>3</sup> C. F. Baes, Jr. and R. E. Mesmer, *The Hydrolysis of Cations*, Wiley, New York, 1976.
